# Supplementary material for: Insights into the prevalence and underlying causes of clonal variation through transcriptomic analysis in Pichia pastoris
Source: PubMed Central journal article supplement (PMC5486821; doi:10.1007/s00253-017-8317-2), 2017-05-22

## Applied Microbiology and Biotechnology

*Pichia pastoris*

---

## Supplementary Materials

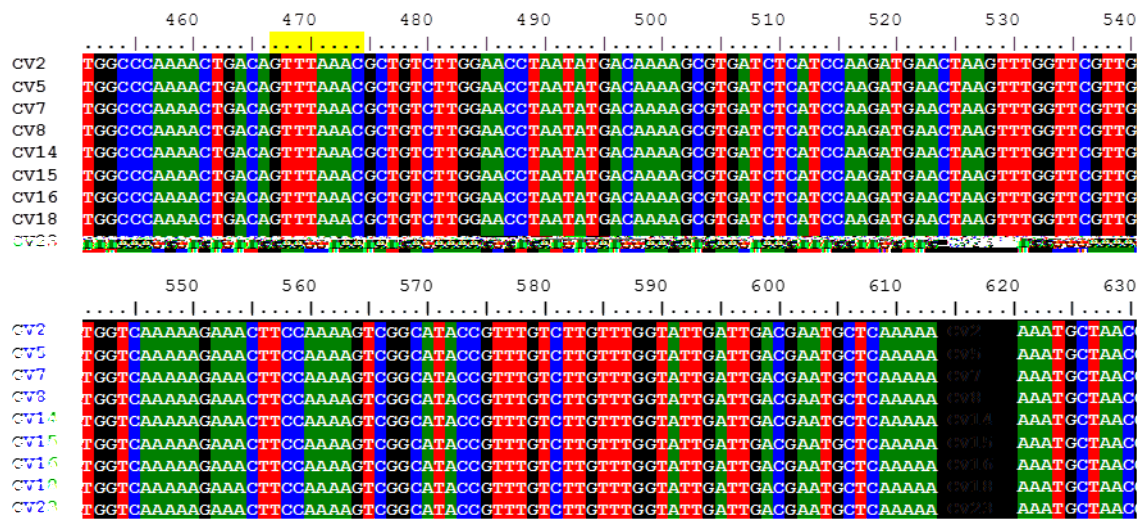

Supplementary Fig. S1

HSA

Pme

Pme

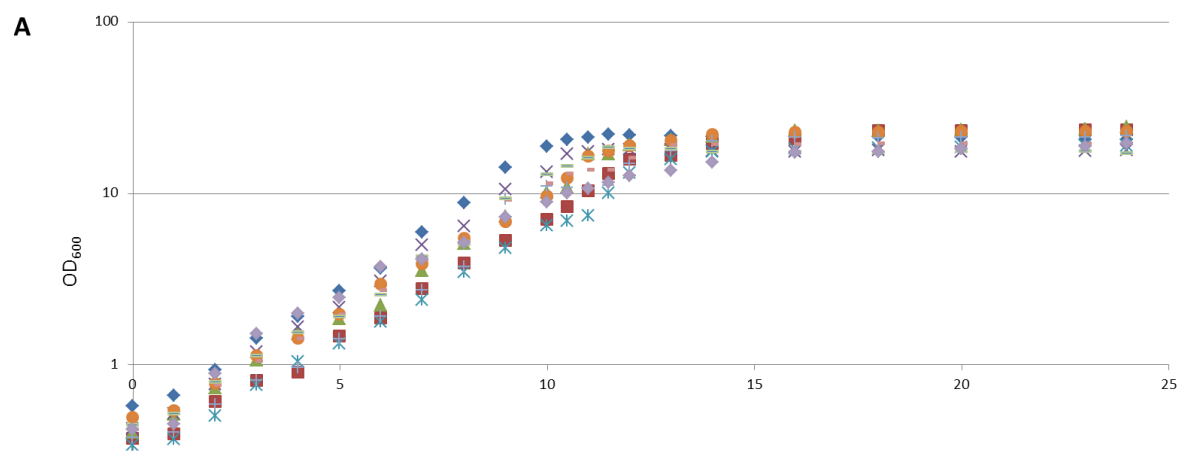

**Supplementary Fig. S2**

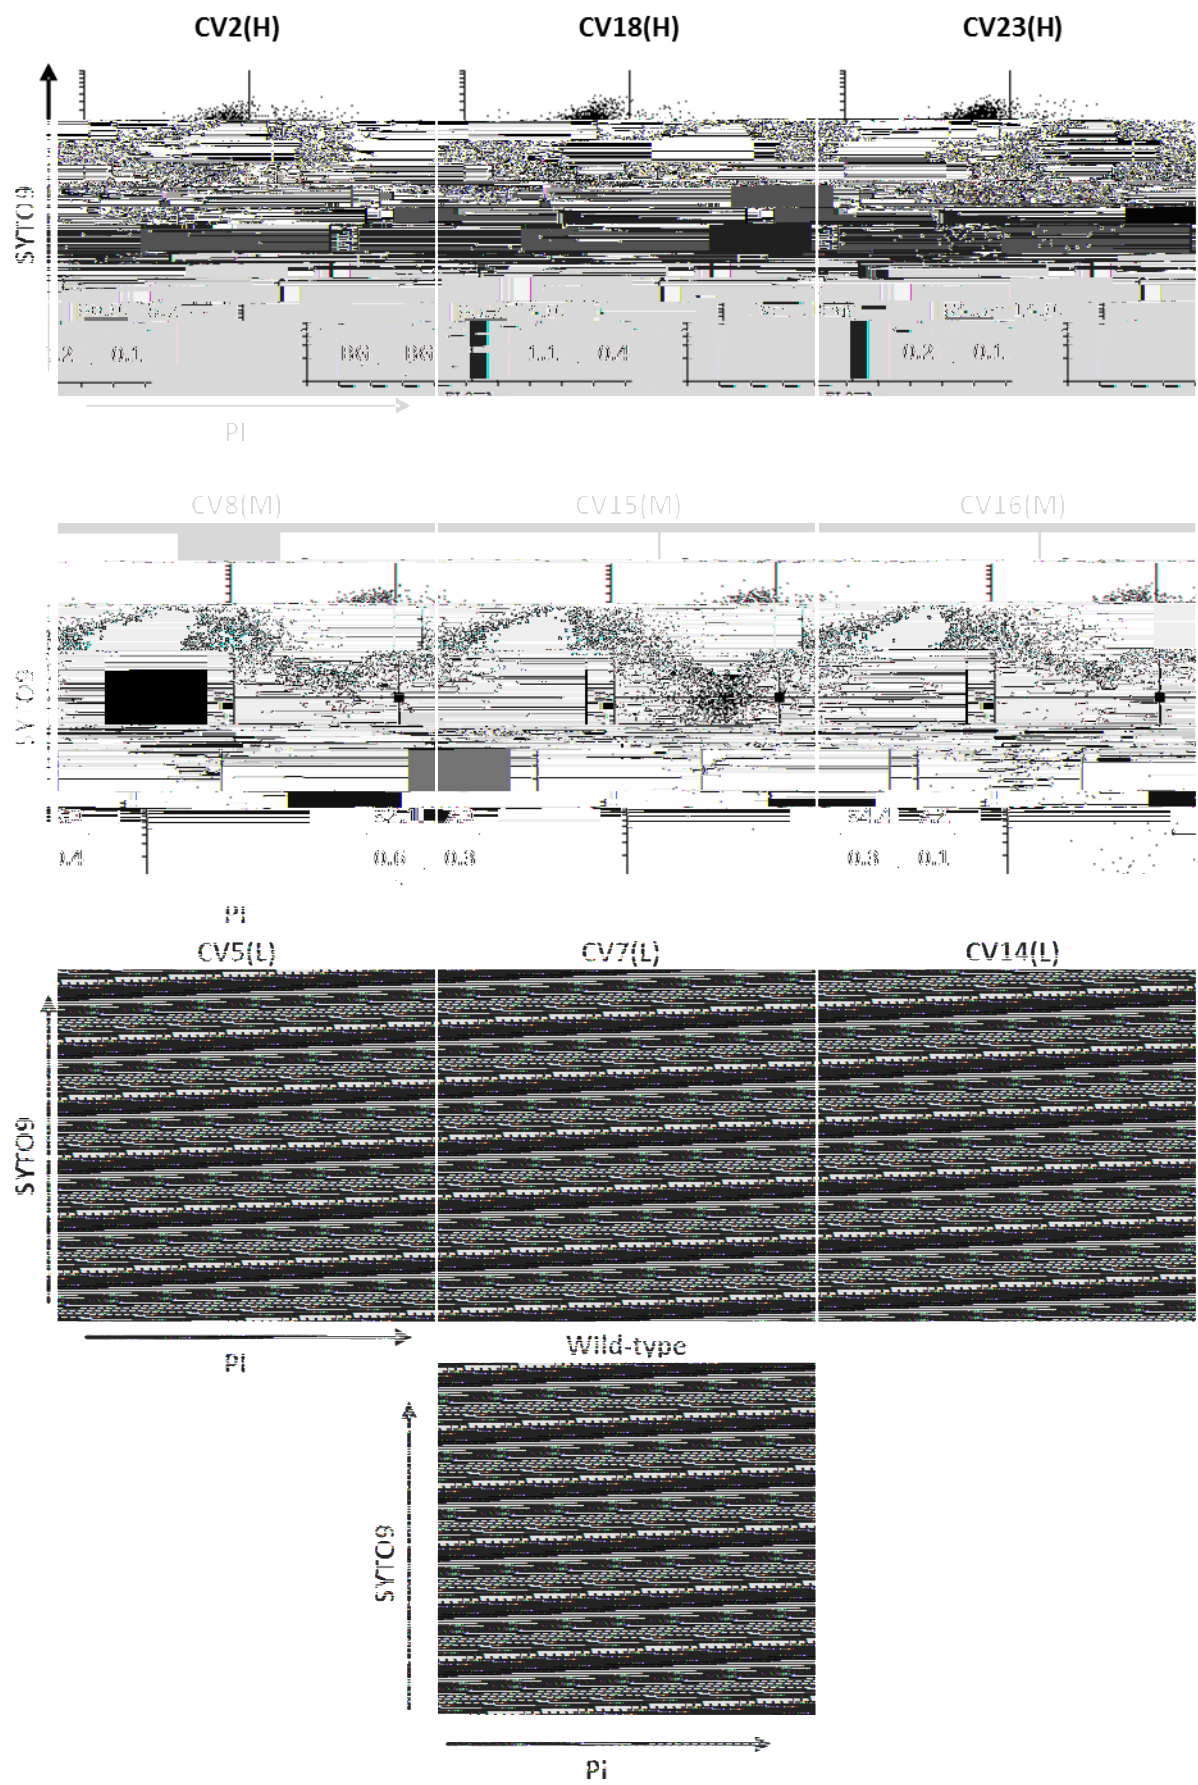

Supplementary Fig. S3





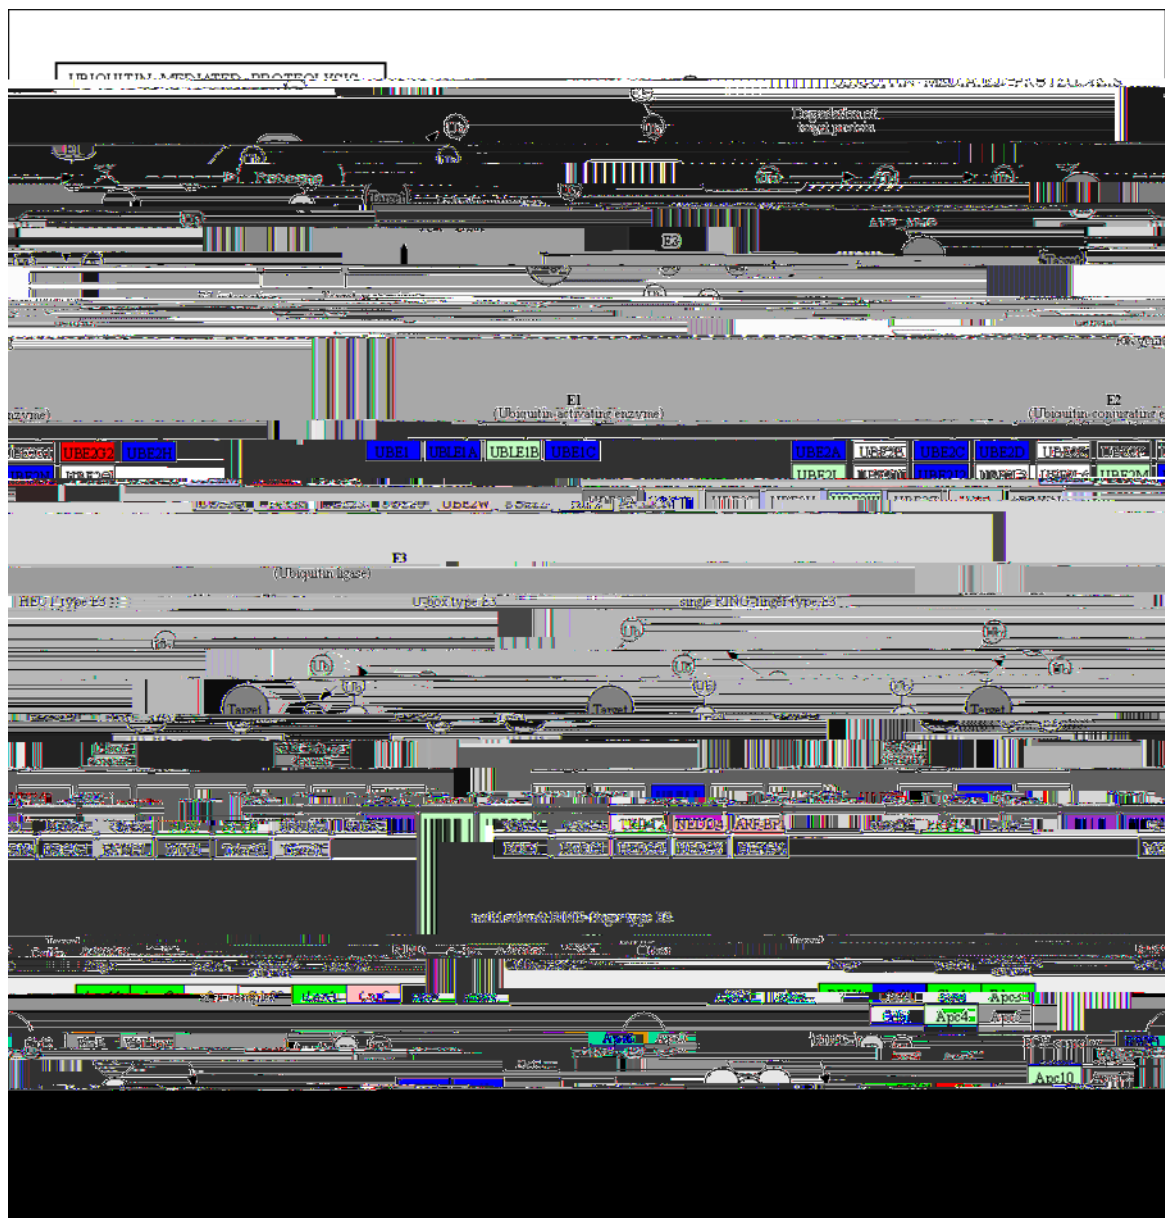

Supplementary Fig. S6

**Supplementary Table S1.**

[illegible]



Supplementary Table S2

| CV5 (L)                     | CV7 (L)                     | CV14 (L)                                    | CV8 (M)                        | CV15 (M)                    | CV16 (M)                    | CV2 (H)                                     | CV18 (H)                                    | CV23 (H)                    |
|-----------------------------|-----------------------------|---------------------------------------------|--------------------------------|-----------------------------|-----------------------------|---------------------------------------------|---------------------------------------------|-----------------------------|
| Aminoacyl-tRNA biosynthesis | Basal transcription factors | Amino sugar and nucleotide sugar metabolism | Cell cycle - yeast             | Basal transcription factors | Aminoacyl-tRNA biosynthesis | Alanine, aspartate and glutamate metabolism | Alanine, aspartate and glutamate metabolism | Basal transcription factors |
| Fatty acid biosynthesis     | Base excision repair        | Basal transcription factors                 | MAPK signaling pathway - yeast | Non-homologous end-joining  | Cyanoamino acid metabolism  | Cell cycle - yeast                          | Amino sugar and nucleotide sugar metabolism | Endocytosis                 |
| Glutathione metabolism      | Cell cycle - yeast          | Cell cycle - yeast                          | Mismatch repair                | One carbon pool by folate   | Endocytosis                 | Fatty acid biosynthesis                     | Aminoacyl-tRNA biosynthesis                 |                             |

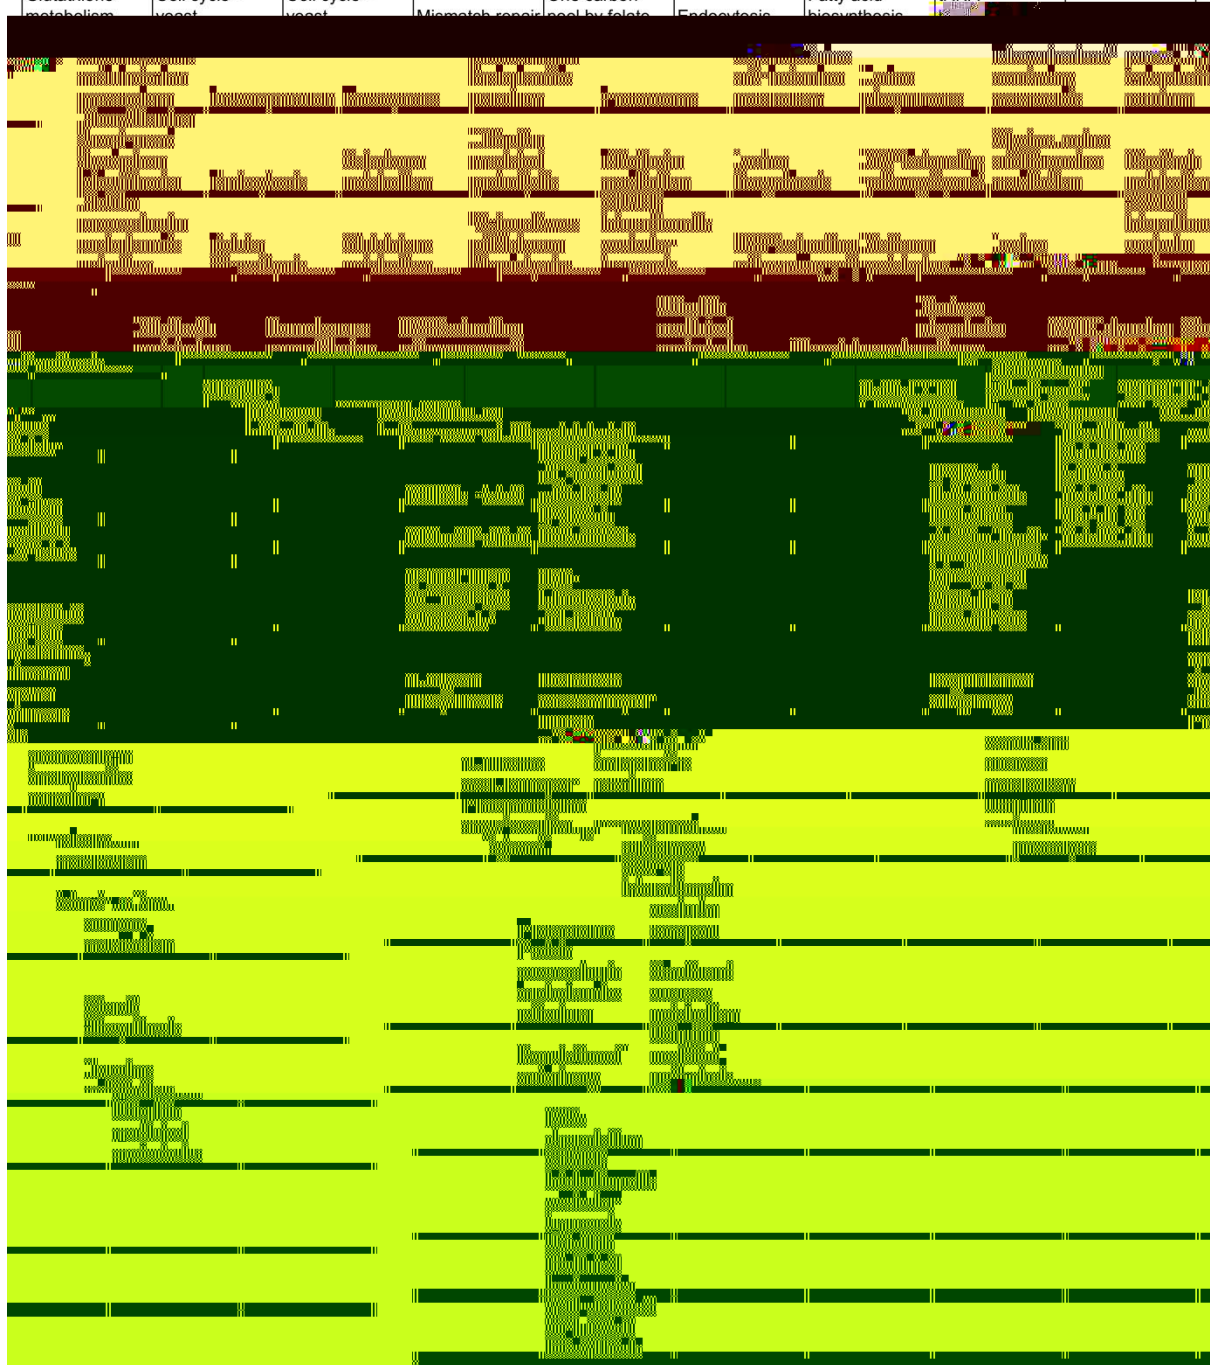

Supplement: 253_2017_8317_MOESM1_ESM.pdf&service=browserrender&system=6 [file 253_2017_8317_MOESM1_ESM.pdf%26service%3Dbrowserrender%26system%3D6]
