# Supplementary material for: Insights into the prevalence and underlying causes of clonal variation through transcriptomic analysis in Pichia pastoris
Source: PubMed Central journal article supplement (PMC5486821; doi:10.1007/s00253-017-8317-2), 2017-05-22
Supplement: 253_2017_8317_MOESM1_ESM.pdf [file 253_2017_8317_MOESM1_ESM.pdf]

## Applied Microbiology and Biotechnology

Insights into the prevalence and underlying causes of clonal variation through transcriptomic analysis in *Pichia pastoris*

Rochelle Aw<sup>1,2</sup>, Geraint R Barton<sup>3</sup> and David J. Leak<sup>1,4\*</sup>

<sup>1</sup>Department of Life Sciences, Imperial College London, London, SW7 2AZ

<sup>2</sup>Centre for Synthetic Biology and Innovation, Imperial College London, London, SW7 2AZ

<sup>3</sup>Centre for Integrative Systems Biology and Bioinformatics, Imperial College London, London, SW7 2AZ

<sup>4</sup> Current address: Department of Biology & Biochemistry, University of Bath, Bath BA2

7AY, UK

\*Corresponding author

Email: [d.j.leak@bath.ac.uk](mailto:d.j.leak@bath.ac.uk)

Tel: +44 (0) 1225 384309

## Supplementary Materials

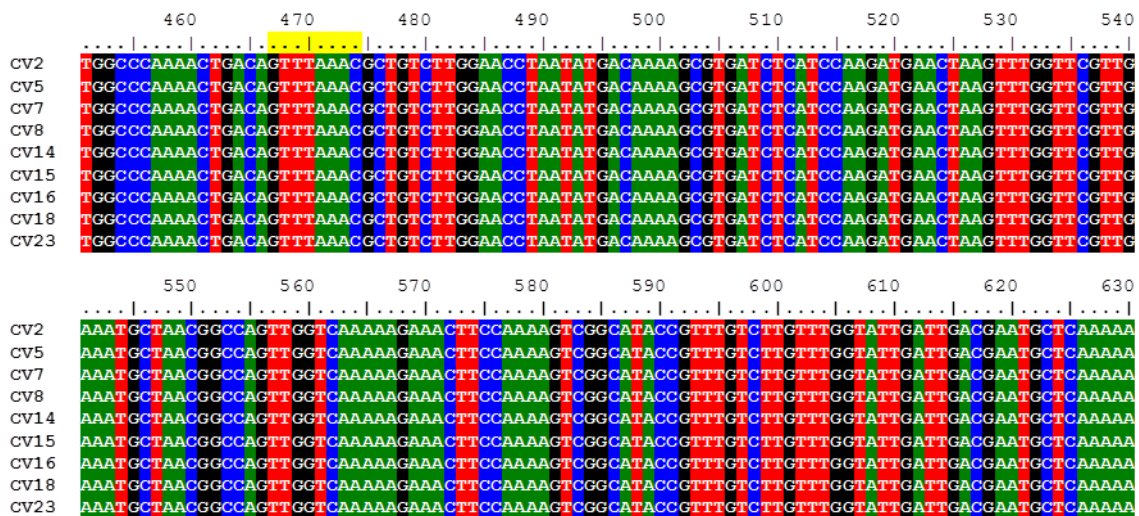

**Supplementary Fig. S1** Sequence alignment of the *HSA* integration site for clones used in microarray analysis. Sequence alignment of the region around the *PmeI* directed integration site of clones CV2, CV5, CV7, CV8, CV14, CV15, CV16, CV18 and CV23. *PmeI* recognises and cuts at the sequence GTTTAAAC, located at 467 and highlighted in yellow

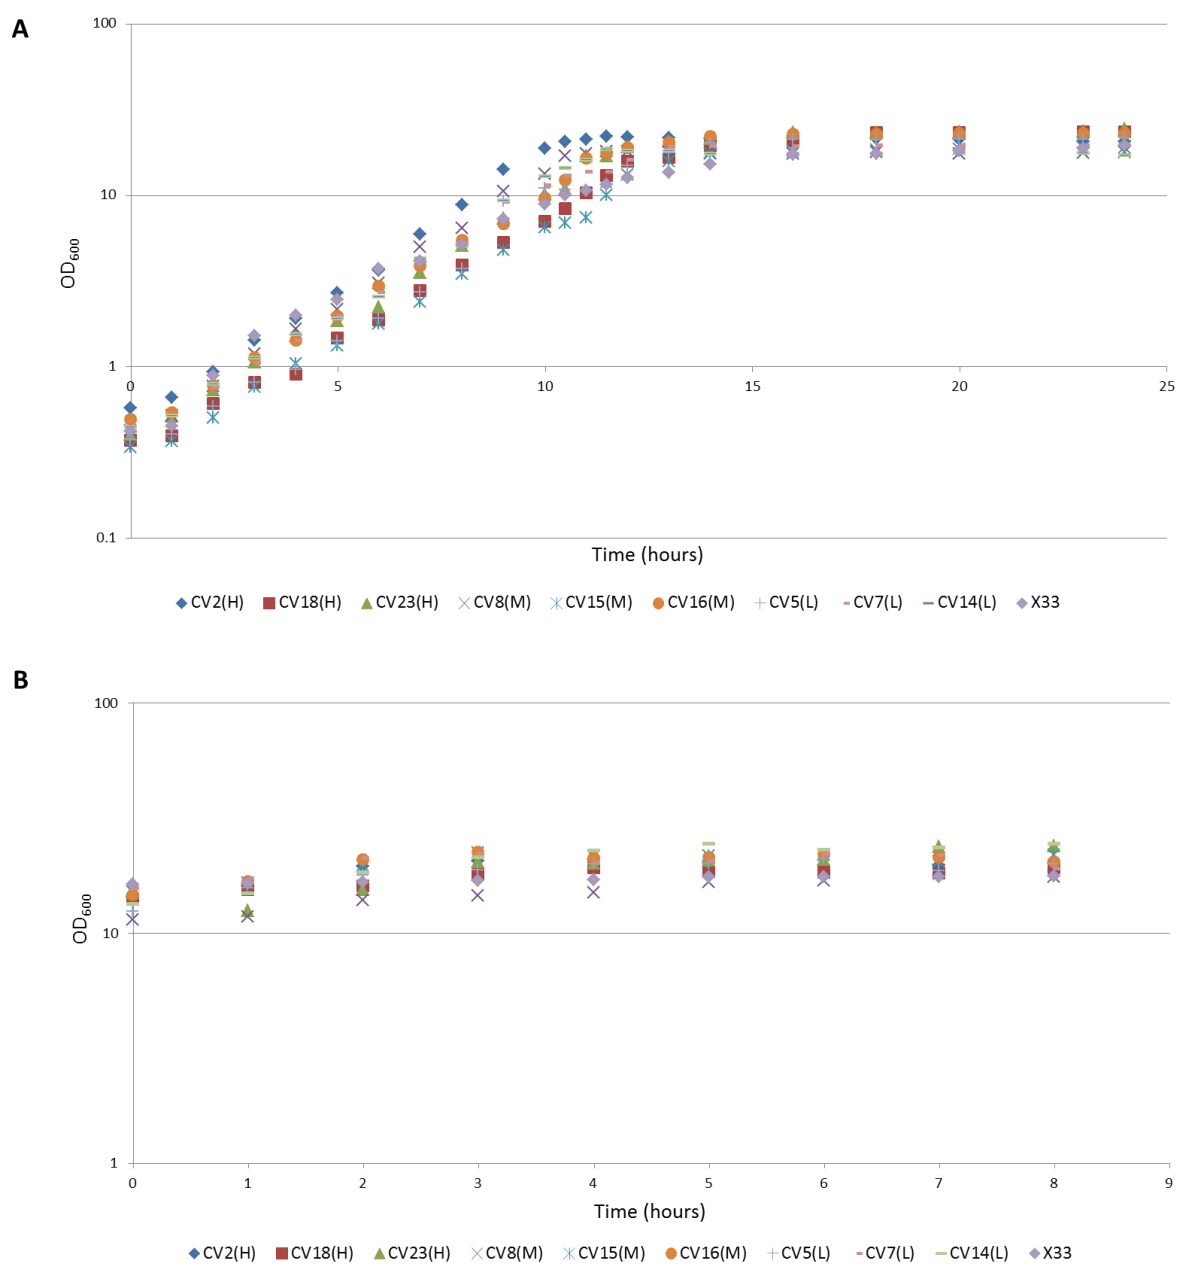

**Supplementary Fig. S2** Growth curves of clonal variation strains. Growth curves were monitored by sampling the cultures every hour and the OD<sub>600</sub> was recorded. Growth in both glycerol and methanol medium was recorded. A) Growth curves in BMGY medium for 25 hours. B) Growth curves in BMMY medium for 8 hours.

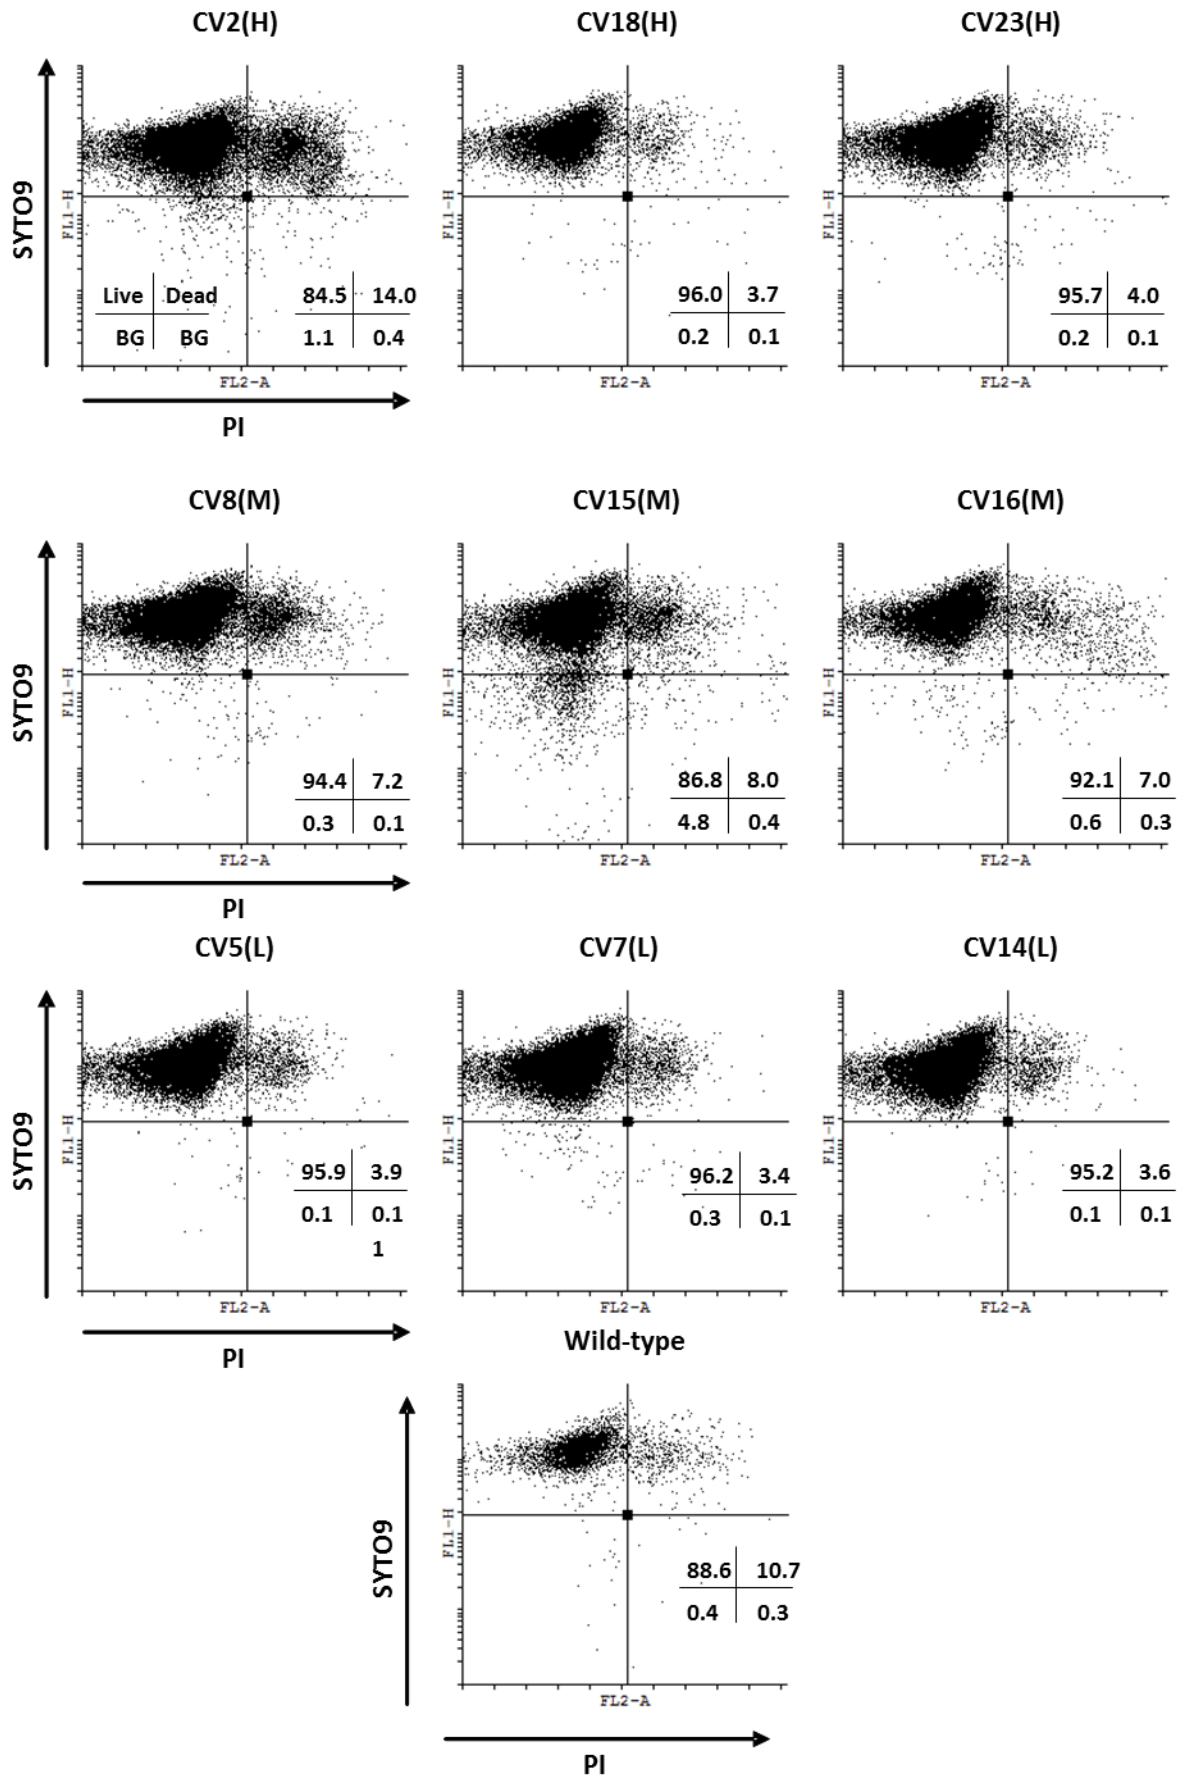

Supplementary Fig. S3 FACS analysis of clonal variants grown for 24 hours in glycerol containing

medium. FL1-H: SYTO9® a green fluorescent nucleic acid stain indicating live cells, FL2-A: propidium iodide a red fluorescent stain indicating dead cells with a damaged membrane. BG: Background noise. Quadrant displays proportion of live/dead cells and background noise.

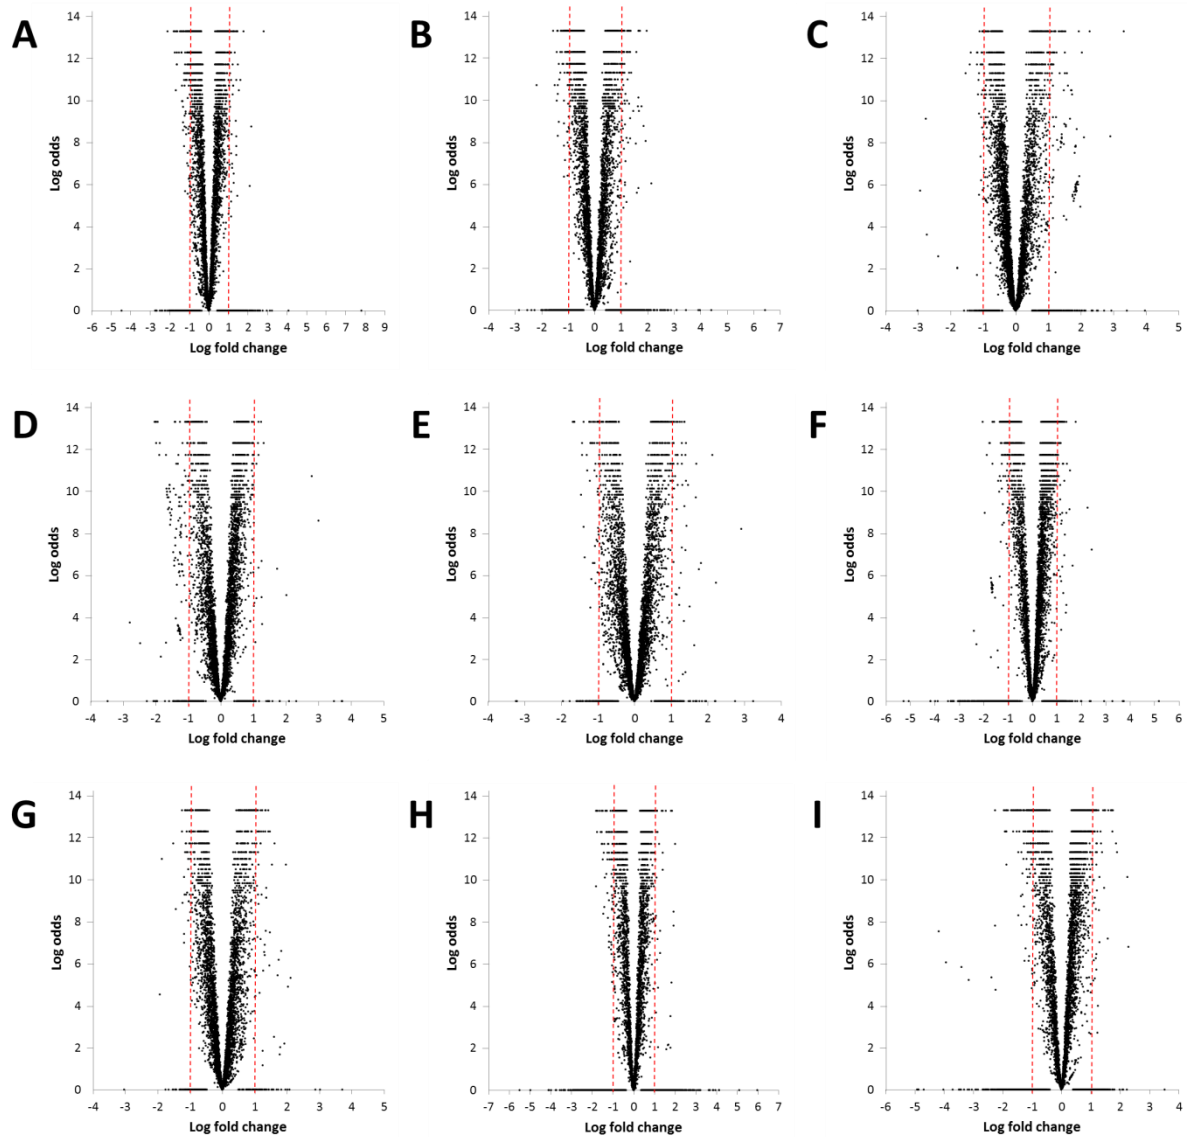

**Supplementary Fig. S4** Volcano plots of fold changes vs. adjusted  $p$  values. A) CV2(H); B) CV18(H); C) CV23(H); D) CV8(M); E) CV15(M); F) CV16(M); G) CV5(L); H) CV7(L); I) CV14(L). Red lines are added for reference to show the boundary of a hypothetical 2 fold change cut-off. No cut-off was used in the analysis presented here, which relied purely on having a false discovery probability of  $<0.05$  (Smyth 2005).

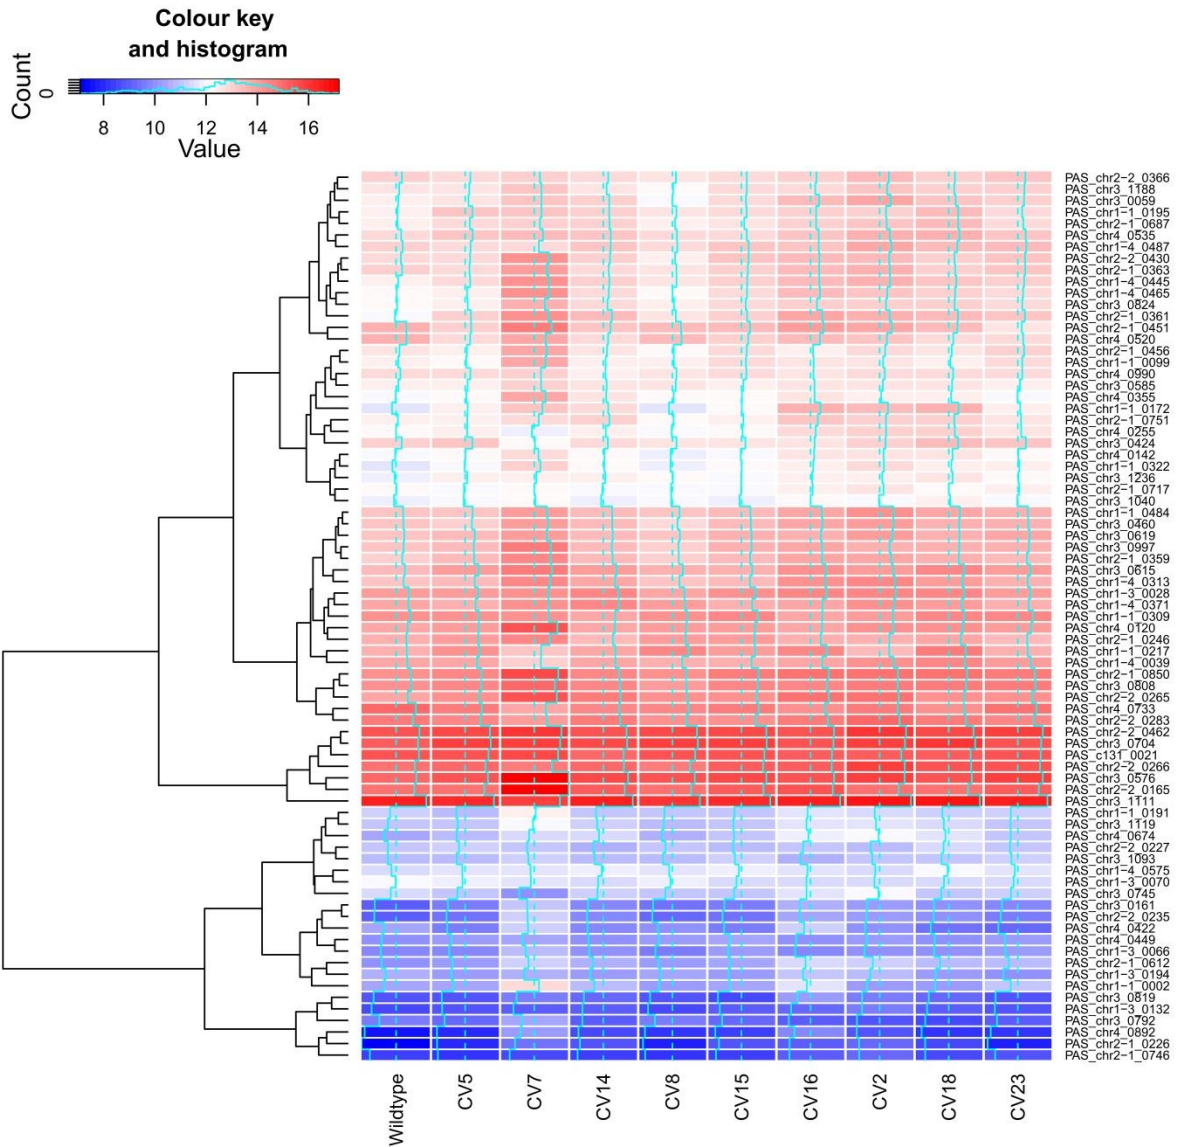

**Supplementary Fig. S5** Expression levels of genes encoding proteins involved in oxidative phosphorylation. Heat maps of log<sub>2</sub> normalised expression levels of genes encoding proteins involved in oxidative phosphorylation, defined by KEGG families, compared to those of wild-type after 24 hour induction with methanol. The associated trees cluster genes with similar expression profiles across all conditions

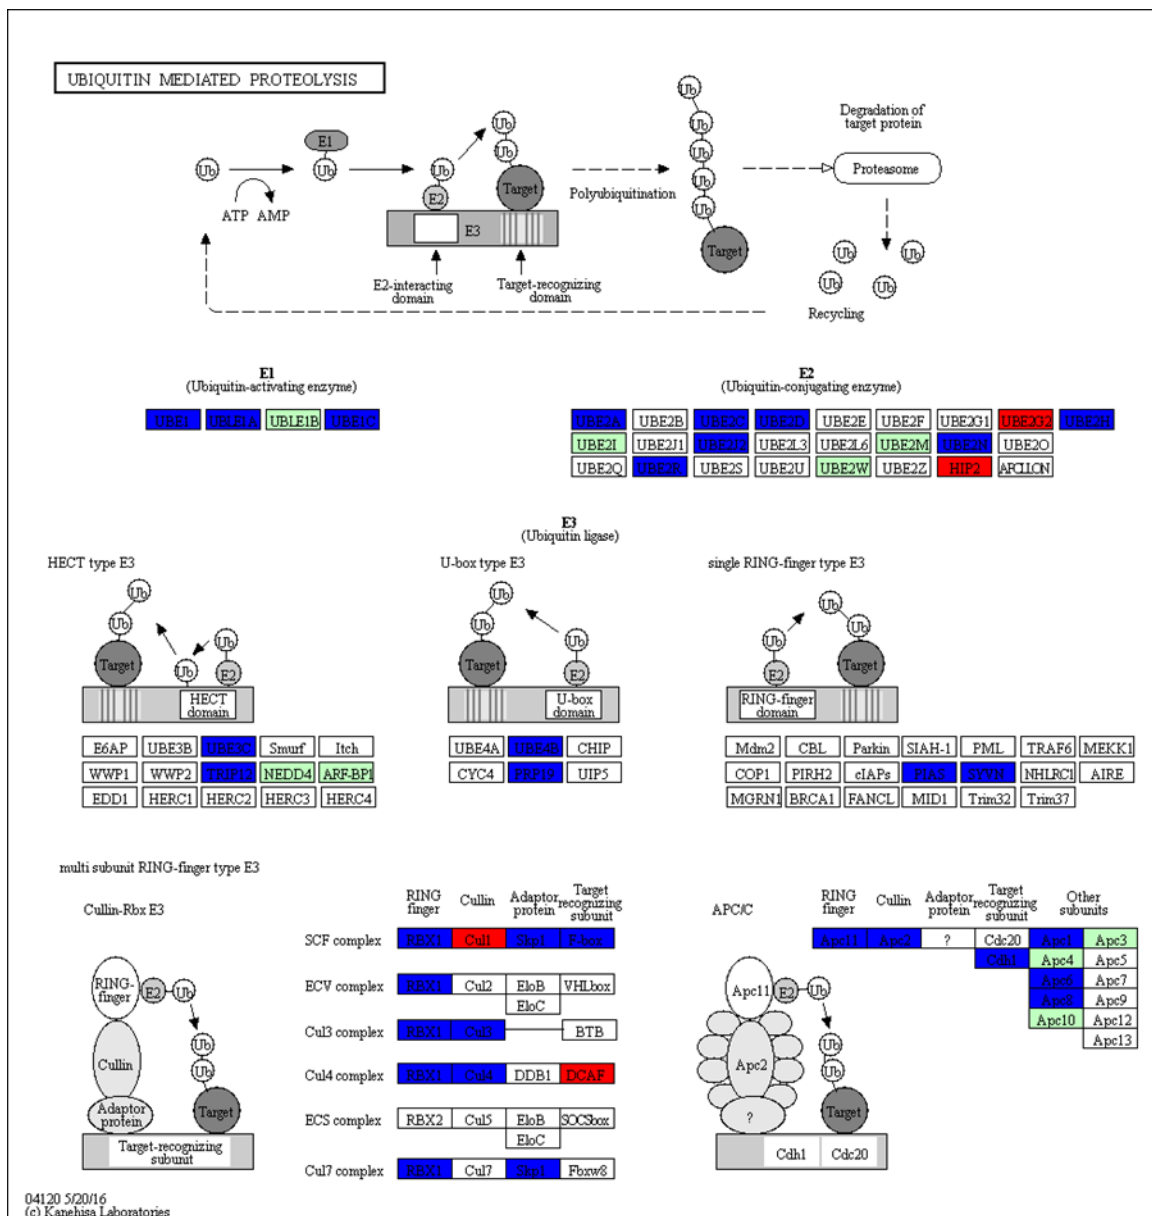

**Supplementary Fig. S6** Genes up- or downregulated in the ubiquitin mediated proteolysis pathway in CV7(L) compared to wild-type. Microarray data was mapped using KEGG Mapper Search & Colour pathway. Blue genes indicate downregulation compared to wild-type and red genes indicate upregulation. Green boxes indicate organism-specific pathways. The figure was generated using the KEGG Search&Color Pathway programme (Kanehisa and Goto 2000; Kanehisa et al. 2012).

**Supplementary Table S1.** Upregulated pathways determined by KOBAS pathway analysis

| CV5 (L)                           | CV7 (L)                                             | CV14 (L)                                            | CV8 (M)                                     | CV15 (M)                                            | CV16 (M)                             | CV2 (H)                                | CV18 (H)                                | CV23 (H)                                            |
|-----------------------------------|-----------------------------------------------------|-----------------------------------------------------|---------------------------------------------|-----------------------------------------------------|--------------------------------------|----------------------------------------|-----------------------------------------|-----------------------------------------------------|
| Fatty acid metabolism             | Alanine, aspartate and glutamate metabolism         | Arginine and proline metabolism                     | Alanine, aspartate and glutamate metabolism | ABC transporters                                    | DNA replication                      | Glycerophospholipid metabolism         | Basal transcription factors             | Cell cycle - yeast                                  |
| Peroxisome                        | Aminoacyl-tRNA biosynthesis                         | Biosynthesis of secondary metabolites               | Arginine and proline metabolism             | Arginine and proline metabolism                     | Oxidative phosphorylation            | Nicotinate and nicotinamide metabolism | Biosynthesis of unsaturated fatty acids | Homologous recombination                            |
| Purine metabolism                 | Biosynthesis of secondary metabolites               | Cysteine and methionine metabolism                  | Biosynthesis of secondary metabolites       | Biosynthesis of secondary metabolites               | Porphyrin and chlorophyll metabolism | Oxidative phosphorylation              | Oxidative phosphorylation               | Meiosis - yeast                                     |
| Ribosome biogenesis in eukaryotes | Cysteine and methionine metabolism                  | Peroxisome                                          | Fatty acid metabolism                       | Glycolysis / Gluconeogenesis                        | Purine metabolism                    | Proteasome                             | Peroxisome                              | Mismatch repair                                     |
| RNA polymerase                    | Lysine biosynthesis                                 | Purine metabolism                                   | Glycerophospholipid metabolism              | Oxidative phosphorylation                           | Pyrimidine metabolism                | Ribosome                               | Ribosome biogenesis in eukaryotes       | Oxidative phosphorylation                           |
| Sphingolipid metabolism           | Metabolic pathways                                  | Pyrimidine metabolism                               | Pentose and glucuronate interconversions    | Peroxisome                                          | Ribosome                             | Ribosome biogenesis in eukaryotes      | RNA degradation                         | Peroxisome                                          |
| Spliceosome                       | mRNA surveillance pathway                           | Ribosome                                            | Pentose phosphate pathway                   | Porphyrin and chlorophyll metabolism                | Ribosome biogenesis in eukaryotes    | RNA transport                          | Spliceosome                             | Phosphatidylinositol signaling system               |
|                                   | Oxidative phosphorylation                           | Ribosome biogenesis in eukaryotes                   | Peroxisome                                  | Ribosome                                            | RNA polymerase                       | Steroid biosynthesis                   | Sulfur relay system                     | Ribosome biogenesis in eukaryotes                   |
|                                   | Peroxisome                                          | RNA polymerase                                      | Phenylalanine metabolism                    | Ribosome biogenesis in eukaryotes                   | RNA transport                        | Tyrosine metabolism                    |                                         | RNA degradation                                     |
|                                   | Phenylalanine metabolism                            | RNA transport                                       | Porphyrin and chlorophyll metabolism        | RNA transport                                       |                                      |                                        |                                         | Sphingolipid metabolism                             |
|                                   | Phenylalanine, tyrosine and tryptophan biosynthesis | Ubiquinone and other terpenoid-quinone biosynthesis | Purine metabolism                           | Sulfur metabolism                                   |                                      |                                        |                                         | Spliceosome                                         |
|                                   | Ribosome                                            |                                                     | Ribosome biogenesis in eukaryotes           | Ubiquinone and other terpenoid-quinone biosynthesis |                                      |                                        |                                         | Ubiquinone and other terpenoid-quinone biosynthesis |
|                                   | Sulfur metabolism                                   |                                                     | Spliceosome                                 |                                                     |                                      |                                        |                                         |                                                     |
|                                   | Terpenoid backbone biosynthesis                     |                                                     |                                             |                                                     |                                      |                                        |                                         |                                                     |
|                                   | Tyrosine metabolism                                 |                                                     |                                             |                                                     |                                      |                                        |                                         |                                                     |
|                                   | Ubiquinone and other terpenoid-quinone biosynthesis |                                                     |                                             |                                                     |                                      |                                        |                                         |                                                     |
|                                   | Valine, leucine and isoleucine biosynthesis         |                                                     |                                             |                                                     |                                      |                                        |                                         |                                                     |



**Supplementary Table S2** Downregulated pathways determined by KOBAS pathway analysis

| CV5 (L)                                             | CV7 (L)                                     | CV14 (L)                                    | CV8 (M)                                     | CV15 (M)                                  | CV16 (M)                                            | CV2 (H)                                             | CV18 (H)                                            | CV23 (H)                                    |
|-----------------------------------------------------|---------------------------------------------|---------------------------------------------|---------------------------------------------|-------------------------------------------|-----------------------------------------------------|-----------------------------------------------------|-----------------------------------------------------|---------------------------------------------|
| Aminoacyl-tRNA biosynthesis                         | Basal transcription factors                 | Amino sugar and nucleotide sugar metabolism | Cell cycle - yeast                          | Basal transcription factors               | Aminoacyl-tRNA biosynthesis                         | Alanine, aspartate and glutamate metabolism         | Alanine, aspartate and glutamate metabolism         | Basal transcription factors                 |
| Fatty acid biosynthesis                             | Base excision repair                        | Basal transcription factors                 | MAPK signaling pathway - yeast              | Non-homologous end-joining                | Cyanoamino acid metabolism                          | Cell cycle - yeast                                  | Amino sugar and nucleotide sugar metabolism         | Endocytosis                                 |
| Glutathione metabolism                              | Cell cycle - yeast                          | Cell cycle - yeast                          | Mismatch repair                             | One carbon pool by folate                 | Endocytosis                                         | Fatty acid biosynthesis                             | Aminoacyl-tRNA biosynthesis                         | Proteasome                                  |
| Glycine, serine and threonine metabolism            | DNA replication                             | Endocytosis                                 | Protein processing in endoplasmic reticulum | Proteasome                                | Glycine, serine and threonine metabolism            | Lysine biosynthesis                                 | Biosynthesis of secondary metabolites               | Protein processing in endoplasmic reticulum |
| Phenylalanine, tyrosine and tryptophan biosynthesis | Endocytosis                                 | Galactose metabolism                        | Ubiquitin mediated proteolysis              | Riboflavin metabolism                     | Lysine biosynthesis                                 | MAPK signaling pathway - yeast                      | Glycine, serine and threonine metabolism            | Riboflavin metabolism                       |
| Protein processing in endoplasmic reticulum         | Folate biosynthesis                         | Glutathione metabolism                      | Various types of N-glycan biosynthesis      | SNARE interactions in vesicular transport | MAPK signaling pathway - yeast                      | Methane metabolism                                  | Lysine biosynthesis                                 | SNARE interactions in vesicular transport   |
| Riboflavin metabolism                               | Homologous recombination                    | MAPK signaling pathway - yeast              |                                             | Ubiquitin mediated proteolysis            | Mismatch repair                                     | Pentose phosphate pathway                           | MAPK signaling pathway - yeast                      | Steroid biosynthesis                        |
| Ubiquitin mediated proteolysis                      | MAPK signaling pathway - yeast              | Mismatch repair                             |                                             |                                           | Natural killer cell mediated cytotoxicity           | Phenylalanine, tyrosine and tryptophan biosynthesis | Natural killer cell mediated cytotoxicity           |                                             |
|                                                     | Meiosis - yeast                             | Natural killer cell mediated cytotoxicity   |                                             |                                           | N-Glycan biosynthesis                               | Starch and sucrose metabolism                       | Nitrogen metabolism                                 |                                             |
|                                                     | Mismatch repair                             | N-Glycan biosynthesis                       |                                             |                                           | Nucleotide excision repair                          | Vitamin B6 metabolism                               | One carbon pool by folate                           |                                             |
|                                                     | Natural killer cell mediated cytotoxicity   | Non-homologous end-joining                  |                                             |                                           | Phenylalanine, tyrosine and tryptophan biosynthesis |                                                     | Phenylalanine metabolism                            |                                             |
|                                                     | N-Glycan biosynthesis                       | Nucleotide excision repair                  |                                             |                                           | Regulation of autophagy                             |                                                     | Phenylalanine, tyrosine and tryptophan biosynthesis |                                             |
|                                                     | Nucleotide excision repair                  | Protein processing in endoplasmic reticulum |                                             |                                           | Starch and sucrose metabolism                       |                                                     | Protein processing in endoplasmic reticulum         |                                             |
|                                                     | Phosphatidylinositol signaling system       | Regulation of autophagy                     |                                             |                                           | Ubiquitin mediated proteolysis                      |                                                     | Riboflavin metabolism                               |                                             |
|                                                     | Proteasome                                  | SNARE interactions in vesicular transport   |                                             |                                           |                                                     |                                                     | Starch and sucrose metabolism                       |                                             |
|                                                     | Protein processing in endoplasmic reticulum | Starch and sucrose metabolism               |                                             |                                           |                                                     |                                                     | Steroid biosynthesis                                |                                             |
|                                                     | Regulation of autophagy                     | Ubiquitin mediated proteolysis              |                                             |                                           |                                                     |                                                     | Tyrosine metabolism                                 |                                             |
|                                                     | RNA degradation                             |                                             |                                             |                                           |                                                     |                                                     | Ubiquitin mediated proteolysis                      |                                             |
|                                                     | SNARE interactions in vesicular transport   |                                             |                                             |                                           |                                                     |                                                     |                                                     |                                             |
|                                                     | Ubiquitin mediated proteolysis              |                                             |                                             |                                           |                                                     |                                                     |                                                     |                                             |
|                                                     | Various types of N-glycan biosynthesis      |                                             |                                             |                                           |                                                     |                                                     |                                                     |                                             |
